# Supplementary material
Source: PubMed Central journal article supplement (PMC3537140)
Supplement: embor2012186s1.pdf [file embor2012186s1.pdf]

## Supplementary Materials

### **A *Salmonella* Typhi homolog of bacteriophage muramidases controls Typhoid toxin secretion**

Hélène Hodak and Jorge E. Galán\*

Department of Microbial Pathogenesis, Yale University School of Medicine, New Haven, CT06536

#### **Materials and Methods**

**Bacterial strains and plasmids.** The bacterial strains and plasmids used in this study are listed in Supplementary Table S2. All *S. Typhi* strains are derived from the clinical isolate ISP2825 (1). All in frame deletions or insertions into the *S. Typhi* chromosome were generated using the R6K-derived suicide vector pSB890 as previously described (2). Chromosomal DNA from *S. Enteritidis* (from the Roy Curtiss III strain collection) and *Yersinia enterocolitica* strain 8081 (3) (generously provided by Virginia Miller) was obtained using standard methods and used for PCR amplification of the *sty1889* homologs *sen1395* and *ye1815*, respectively. For complementation assays, relevant genes were expressed using the expression plasmid pSB3324. This plasmid is derived from the low copy vector pWSK129 (4) and was generated by exchanging the 0.28 kb *SacI-EcoRI* fragment containing the *lacZ* promoter for a 1.3 kb fragment containing *araC* and the arabinose-inducible promoter amplified from pBAD24 (5). This plasmid vector also allows the placing of a 3xFLAG epitope tag at the carboxy terminus of the protein of interest. Chimeras between different fragments of *Sty1889* and *Sen1395* were generated using overlapping PCRs following standard methods and were expressed using plasmid pSB3324. For bacteriolytic assays and overexpression purposes, all relevant DNA fragments were subcloned into pBAD24. Site directed mutagenesis was carried out by mismatched PCR using KOD Hot Start DNA polymerase (EMD Millipore).

**Bacterial and eukaryotic cell growth conditions.** *S. Typhi* strains were grown in L-broth (LB) on a rotating wheel at 37°C for approximately 16 h followed by a subculture in fresh LB. For infection assays, the subculture was done in LB containing 0.3 M NaCl (to stimulate expression of the SPI-1 type III secretion system). When appropriate 50 µg/mL Kanamycin, 100 µg/mL or 100 µg/ml Ampicillin were added. Henle-407 cells were grown at 37°C and 5% CO<sub>2</sub> in DMEM medium supplemented with 10% bovine calf serum (BCS, HyClone).

**Cultured epithelial cell infection assays.** Overnight cultures of *S. Typhi* strains were diluted 1:33 in fresh LB medium containing 0.3 M NaCl and grown for 3 h to an OD<sub>600 nm</sub> of 0.9. Infections were carried out in HBSS medium for 1 h using a multiplicity of infection of 30. Cells were then incubated in DMEM containing 10% BCS and 100 µg/mL Gentamicin for 1 h followed by 10 µg/mL Gentamicin incubation for additional 20 h. For *S. Typhi* strains harboring pSB3324-derived plasmids, protein expression was induced with 0.0008% arabinose for 20 hs. The induction conditions were optimized to match plasmid-mediated expression levels of StsA after 22 hours of infection to those of chromosomally expressed StsA from its natural promoter, as assessed by Western blot.

**Immunofluorescence microscopy.** Twenty-two hours after infection, Henle-407 cells (grown on glass coverslips) were rinsed with phosphate buffered saline (PBS) and fixed 15 min at room temperature with 4% paraformaldehyde in PBS. Samples were incubated in 50 mM NH<sub>4</sub>Cl in PBS for 10 min to quench free aldehydes and then blocked in 1% bovine serum albumin and 0.1% Triton X-100 in PBS (BT-PBS) for 20 min. Coverslips were incubated in BT-PBS for 30 min with primary anti-FLAG M2 mouse monoclonal antibody (Sigma) (1:10,000) and anti-*Salmonella* O poly A-I & Vi rabbit antiserum (Becton, Dickinson and Co.) (1:2,000), followed by 30 min incubation with 0.5 µg/mL 4',6-diamidino-2-phenylindole (DAPI) and secondary antibodies anti-mouse Alexa Fluor-488 and anti-rabbit Alexa Fluor-594 (Invitrogen) (1:2,000). Samples were visualized in an Eclipse TE2000-U (Nikon) microscope equipped with a CCD camera (MicroMAX RTE/CCD-1300Y; Princeton Instruments). Quantification of fluorescence intensity was carried out using ImageJ.

**Bacteriolytic assays.** *S. Typhi*  $\Delta$ *ttsA* expressing various 3xFLAG tagged proteins from pBAD24-derived vectors were grown overnight in LB medium supplemented with 100 µg/mL Ampicillin. Overnight grown bacteria were diluted to an OD<sub>600</sub> nm of 0.1 in fresh LB medium containing 0.2% arabinose. After 60 min of induction, 0.3% CHCl<sub>3</sub> was added to the cultures and lysis was monitored for additional 60 min by measuring their OD<sub>600</sub> nm. Aliquots were collected immediately prior to adding CHCl<sub>3</sub> and boiled in Laemmli buffer for 5 min. The OD<sub>600</sub> nm of the bacterial cultures was used to standardize the samples prior to western blot analysis using an anti-FLAG M2 monoclonal antibody 1:10,000 (Sigma) and a secondary anti-mouse infra red-800 nm antibody 1:16,000. To grow strains carrying pSB3324-derived vectors, the medium was supplemented with 50 µg/ml kanamycin. In this case, induction of expression was carried out by adding 0.3% arabinose and the assay carried out as described above. For holin assisted bacteriolysis, overnight cultures were diluted in fresh LB medium to an OD<sub>600</sub> nm of 0.1 and further grown to an OD<sub>600</sub> nm of 0.5. At that time, 0.002% arabinose was added to the cultures in order to induce holin and/or endolysin expression and bacterial lysis was monitored for additional 280 min by measuring the OD<sub>600</sub> nm of the bacterial cultures. Culture aliquots were collected 30 min following the induction with arabinose and protein expression analyzed as indicated above.

**Detection of TtsA and CdtB during the course of infection.** Henle-407 cells were infected as described above with a strain of *S. Typhi* encoding chromosomally-encoded FLAG-tagged TtsA and CdtB. At various times of infection, cells were lysed using 0.1% sodium deoxycholate and 10 µg/mL DNase I in PBS and sample aliquots were plated on LB medium to determine c.f.u. The remaining samples were centrifuged at 10,000 g for 20 min at 4°C. Bacterial pellets were resuspended in Laemmli buffer and boiled for 5 minutes. The presence of TtsA and CdtB was determined by Western blot analysis. C.f.u. counts were used to load equivalent amounts of bacterial lysates for each time point.

**Phylogenetic, genomic, and structural analyses.** Phylogenetic trees were generated using ClustalW2 (6). Homologs of Sty1889 were identified using BLASTP. Only homologs with identity superior to 50% were retained for further analysis. To simplify the tree, only one representative of proteins exhibiting >95% identity to each other was included. For genomic analyses, the PHAGE Search Tool (PHAST) web server (7) was used to search for the presence of phage genes in the vicinity of the Sty1889 homologs. Genomic context of endolysin coding genes shown in Supplementary Table S1 was manually obtained from the NCBI nucleotide data-

bases. Each locus containing an endolysin coding gene was analyzed for the presence of a holin as well as extracellular enzyme encoding genes using the NCBI nucleotide database in combination with manual *in silico* analyses. Modeling of the atomic structure of TtsA was done using (<http://www.sbg.bio.ic.ac.uk/~phyre/>) with the structure deposited as pdb2IS5 as a template.

## **References**

1. Galan JE, Curtiss R, 3rd. Distribution of the *invA*, -B, -C, and -D genes of *Salmonella typhimurium* among other *Salmonella* serovars: *invA* mutants of *Salmonella typhi* are deficient for entry into mammalian cells. *Infect Immun*. 1991;59(9):2901-8. Epub 1991/09/01.
2. Kaniga K, Bossio JC, Galan JE. The *Salmonella typhimurium* invasion genes *invF* and *invG* encode homologues of the AraC and PulD family of proteins. *Mol Microbiol*. 1994;13(4):555-68. Epub 1994/08/01.
3. Portnoy D, Moseley S, Falkow S. Characterization of plasmids and plasmid-associated determinants of *Yersinia enterocolitica* pathogenesis. *Infect Immun*. 1981; 31: 775–82.
4. Wang RF, Kushner SR. Construction of versatile low-copy-number vectors for cloning, sequencing and gene expression in *Escherichia coli*. *Gene*. 1991;100:195-9.
5. Guzman LM, Belin D, Carson MJ, Beckwith J. Tight regulation, modulation, and high-level expression by vectors containing the arabinose PBAD promoter. *J Bacteriol*. 1995;177:4121-30.
6. Larkin MA, Blackshields G, Brown NP, Chenna R, McGettigan PA, McWilliam H, et al. Clustal W and Clustal X version 2.0 *Bioinformatics* 23 (21) 2947-2948. *Bioinformatics*. 2007;23:2947-8.
7. Zhou Y, Liang Y, Lynch KH, Dennis JJ, Wishart DS. PHAST: a fast phage search tool. *Nucleic Acids Res*. 2011;39:W347-52.
8. Zhou Y, Liang Y, Lynch KH, Dennis JJ, Wishart DS. PHAST: a fast phage search tool. *Nucleic Acids Res*. 2011;39(Web Server issue):W347-52. Epub 2011/06/16.

Supplementary Figures

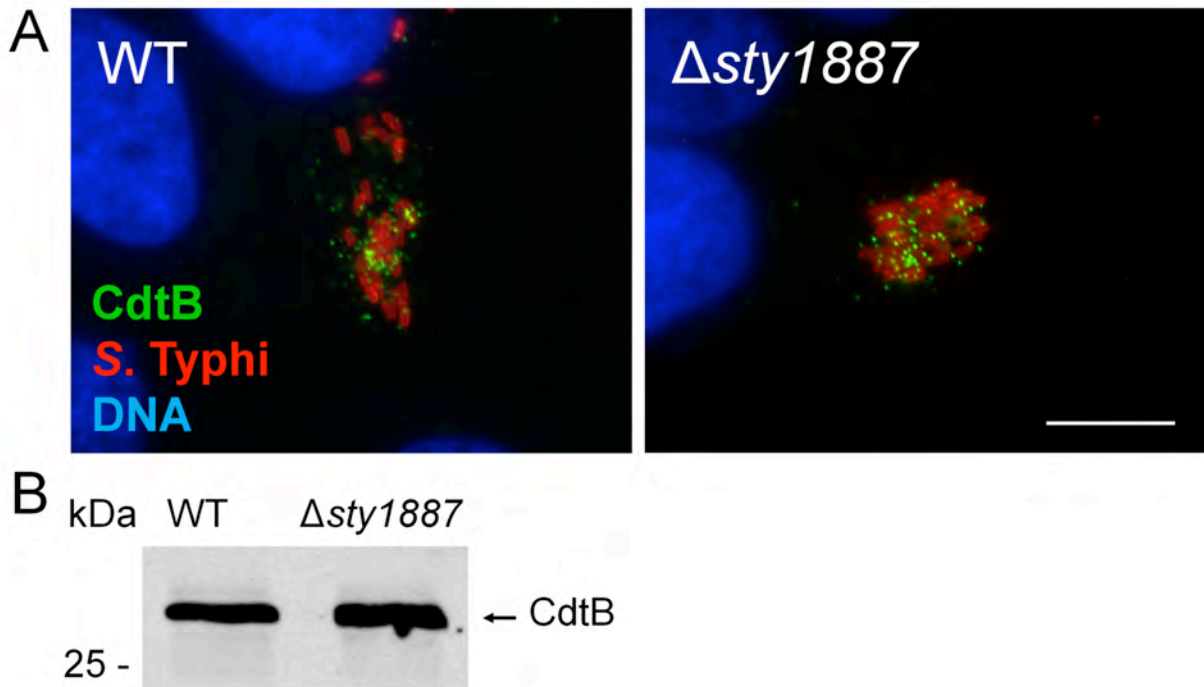

**Figure S1** | Deletion of *sty1887* has no effect on typhoid toxin secretion. **(A)** Henle-407 cells were infected with *S. Typhi* expressing chromosomally encoded 3xFLAG epitope tagged *cdtB* or an isogenic  $\Delta sty1887$  mutant. Twenty-two hours after infection cells were stained with an antibody directed to the FLAG epitope (green) (to visualize CdtB), a rabbit antibody directed to *S. Typhi* LPS (red), and DAPI for DNA detection (blue). The bar represents 10  $\mu\text{m}$ . **(B)** Western blot analysis of the expression levels of CdtB in the strains used in panel (A).

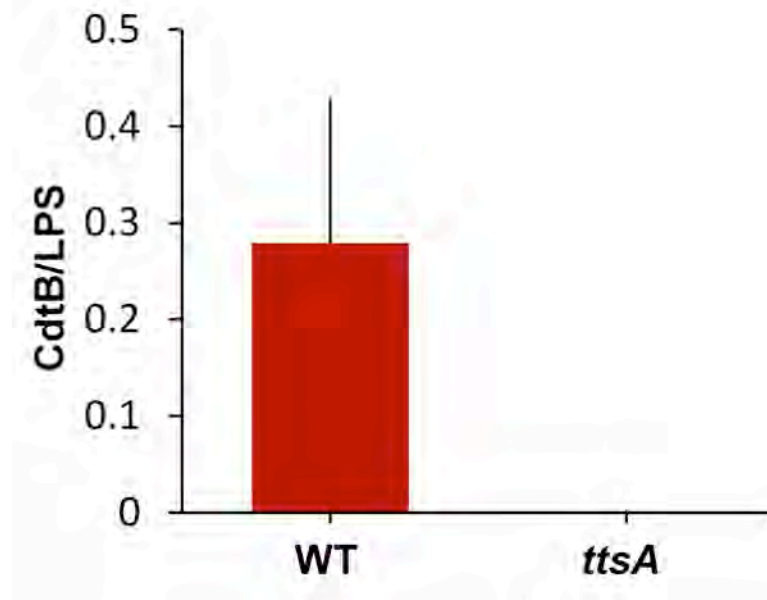

**Figure S2** | Typhoid toxin secretion is abolished in  $\Delta ttsA$  background. Henle-407 cells were infected with *S. Typhi* expressing chromosomally encoded 3xFLAG-epitope-tagged CdtB or a  $\Delta ttsA$  isogenic mutant. Twenty-two hours after infection cells were stained with an antibody directed to the FLAG epitope (to visualize CdtB), and a rabbit antibody directed to *S. Typhi* LPS (to visualize bacteria). The fluorescence intensity associated with toxin detection was quantified as indicated in the Materials and Methods section. 52 and 50 images of host cells infected by the wild type or  $\Delta ttsA$  *S. Typhi*, respectively, were acquired. The LPS signal was used to normalize the Typhoid toxin signal. The averaged ratios green/red and the corresponding standard deviations are shown (note: the signal in the *ttsA* mutant strain was too low to appear in the scale of the graph).

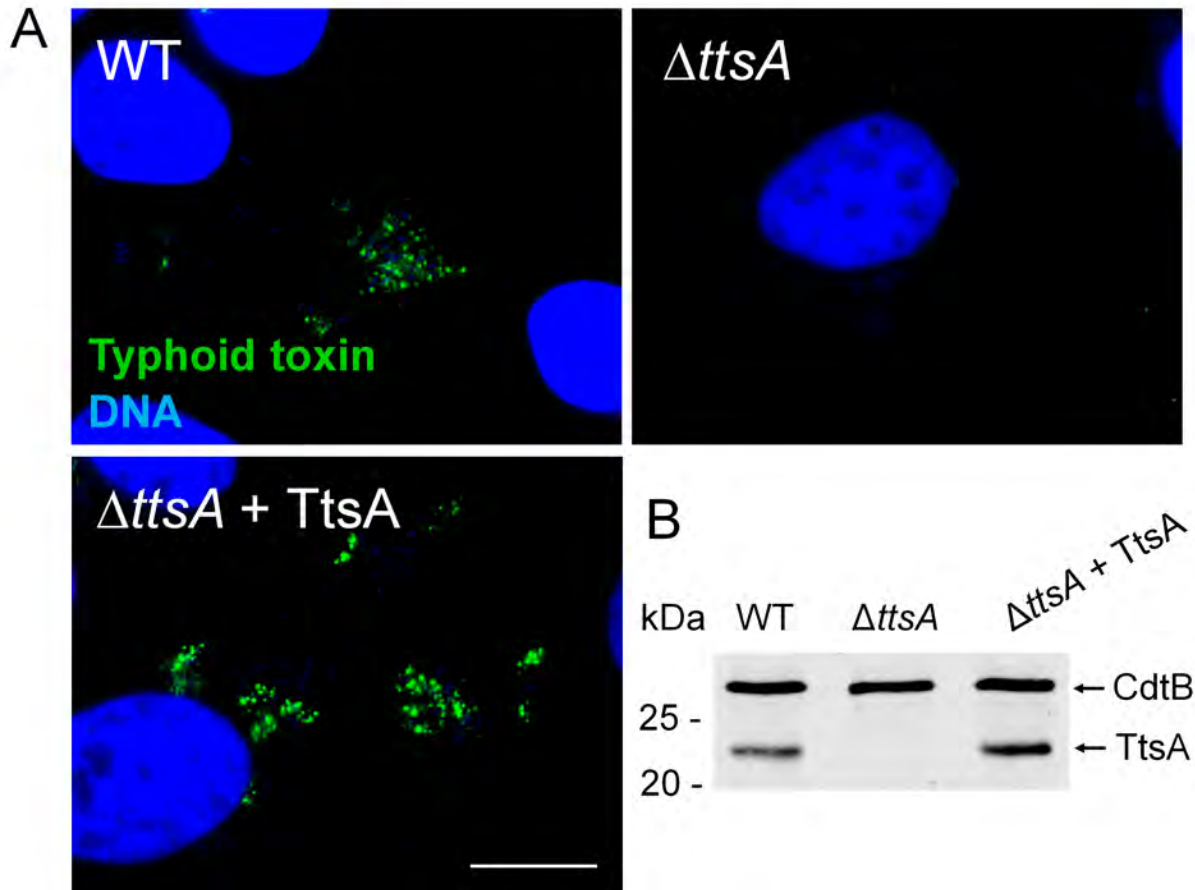

**Figure S3** | Typhoid toxin secretion is abolished in  $\Delta ttsA$  background. **(A)** Henle-407 cells were infected with *S. Typhi*, a  $\Delta ttsA$  isogenic mutant, or the  $\Delta ttsA$  complemented derivative. Twenty-two hours after infection cells were stained with a rabbit polyclonal antibody directed to the typhoid toxin (green), and DAPI for DNA detection (blue). The bar represents 10  $\mu\text{m}$ . **(B)** Western blot analysis of the expression levels of the indicated proteins in the strains used in panel (A).

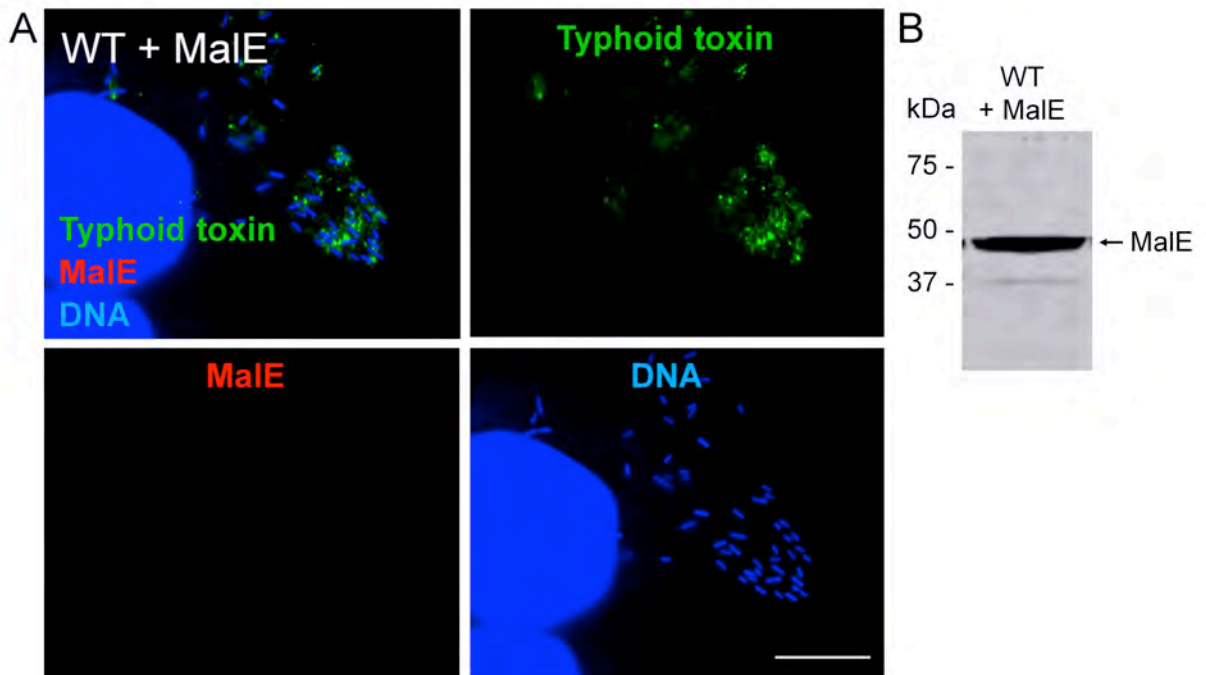

**Figure S4** | Typhoid toxin secretion is specific. **(A)** Henle-407 cells were infected with wild type *S. Typhi* expressing from a low copy plasmid 3xFLAG tagged periplasmic protein MaleE. Twenty-two hours after infection cells were stained with a rabbit polyclonal antibody directed to the typhoid toxin (green), a mouse monoclonal antibody directed to the FLAG epitope (red) (to detect MaleE) and DAPI for DNA detection (blue). The bar represents 10  $\mu$ m. **(B)** Western blot analysis was used to confirm the expression of MaleE.

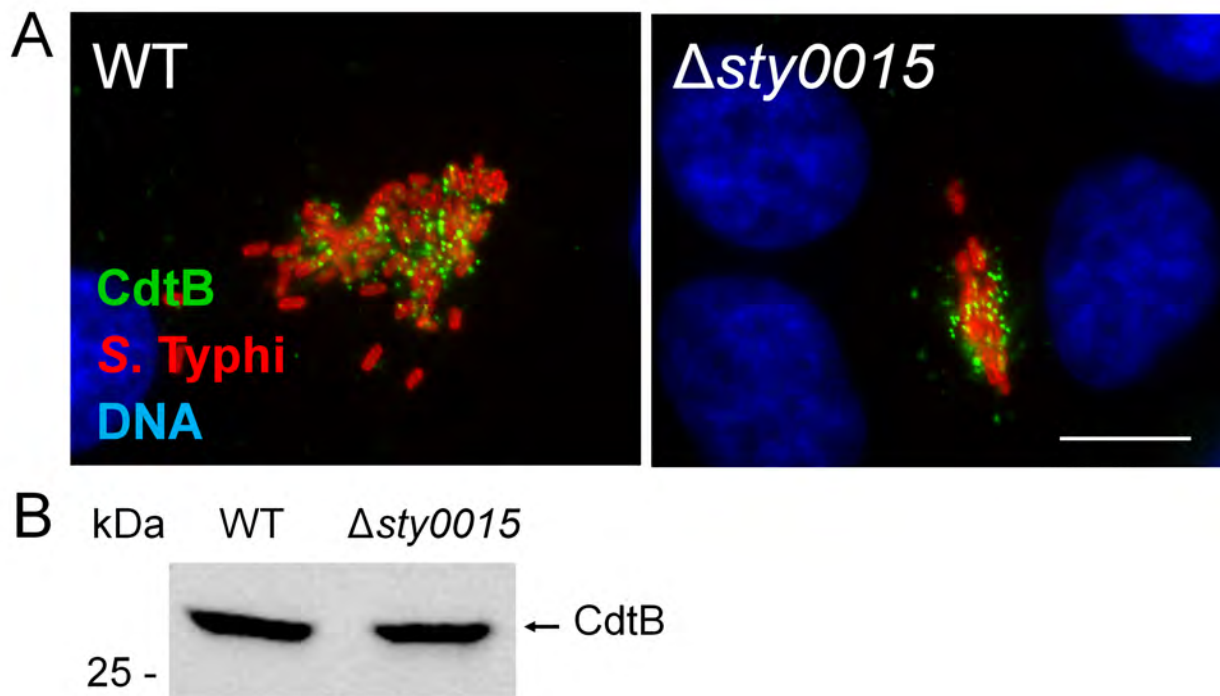

**Figure S5** | The *S. Typhi* holin Sty0015 is not required for toxin secretion. **(A)** Henle-407 cells were infected with *S. Typhi* expressing chromosomally encoded 3xFLAG epitope tagged *cdtB* or an isogenic  $\Delta sty0015$  mutant. Twenty-two hours after infection cells were stained with an antibody directed to the FLAG epitope (green) (to visualize CdtB), a rabbit antibody directed to *S. Typhi* LPS (red), and DAPI for DNA detection (blue). The bar represents 10  $\mu\text{m}$ . **(B)** Western blot analysis of the expression levels of CdtB in the strains used in panel (A).



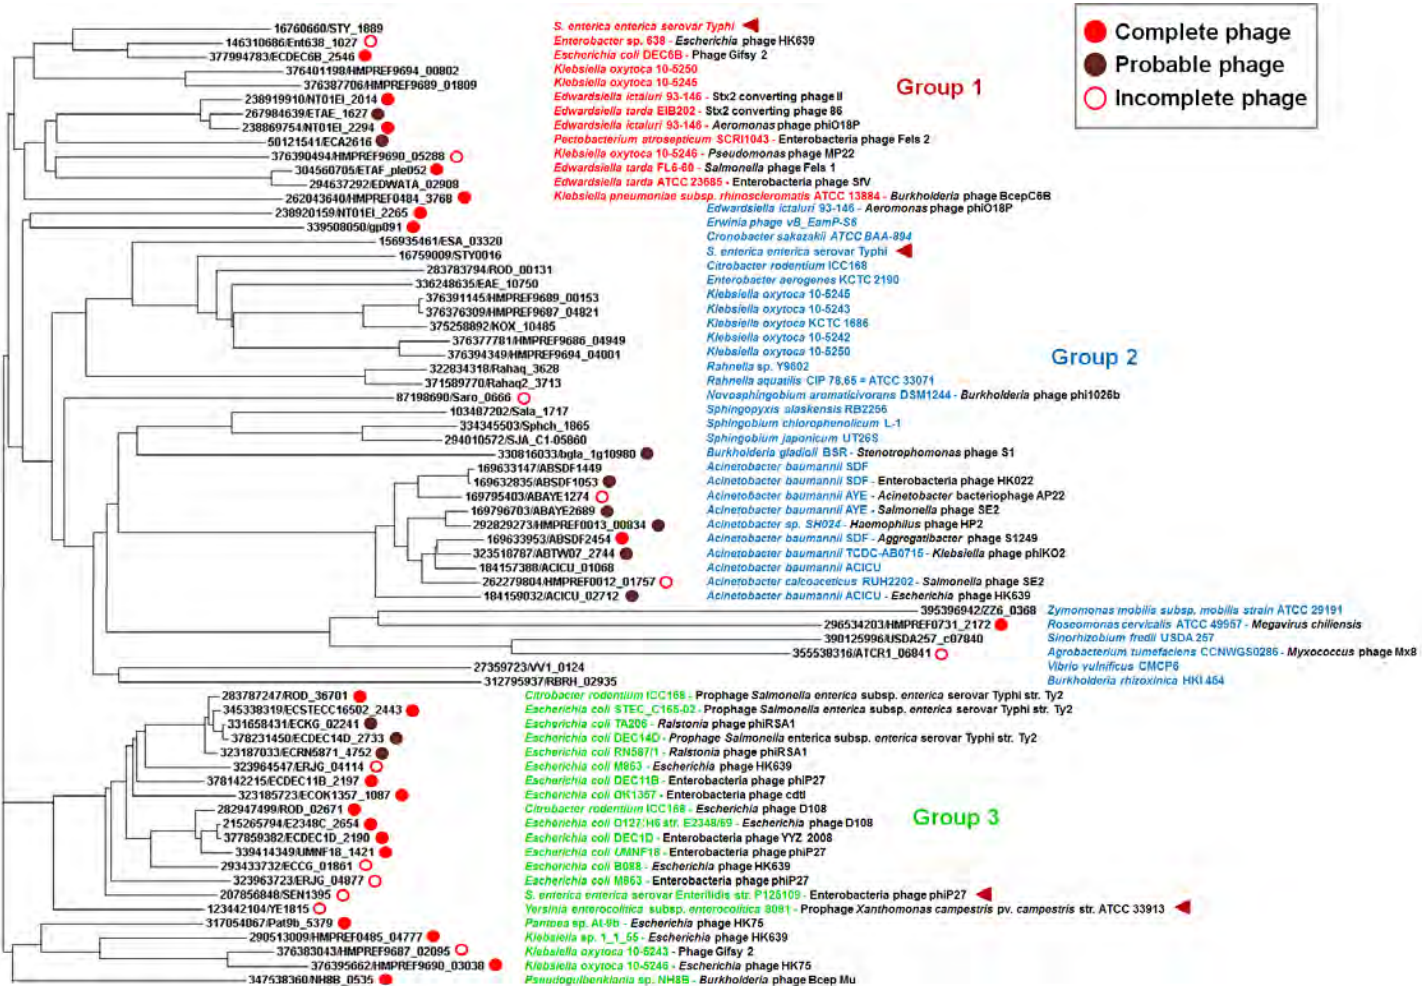

**Figure S6 |** Phylogenetic representation of TtsA homologs. The phylogenetic tree was generated using ClustalW2. TtsA homologs were identified using NCBI and coliBASE BLASTP. Homologs with identity superior to 50% are represented. In addition, ZliS (ZZ6\_0368) from *Zymomonas mobilis* and its close homologs encoded by *Roseomonas cervicalis*, *Sinorhizobium fredii*, and *Agrobacterium tumefaciens* were also added to the tree. Homologs are depicted in three major groups 1, 2 and 3 (depicted in red, blue and green, respectively) based on their similarity. The PHAGE Search Tool (PHAST) web server was used to analyze the loci of all the TtsA homologs represented in the tree to identify possible prophages. The red, plum and empty red dots indicate TtsA homologs located in complete, probably complete, or incomplete phage loci, respectively, as indicated by the PHAST tool. The likely identity of each phage is also indicated. The proteins investigated in this study are indicated with red arrows.

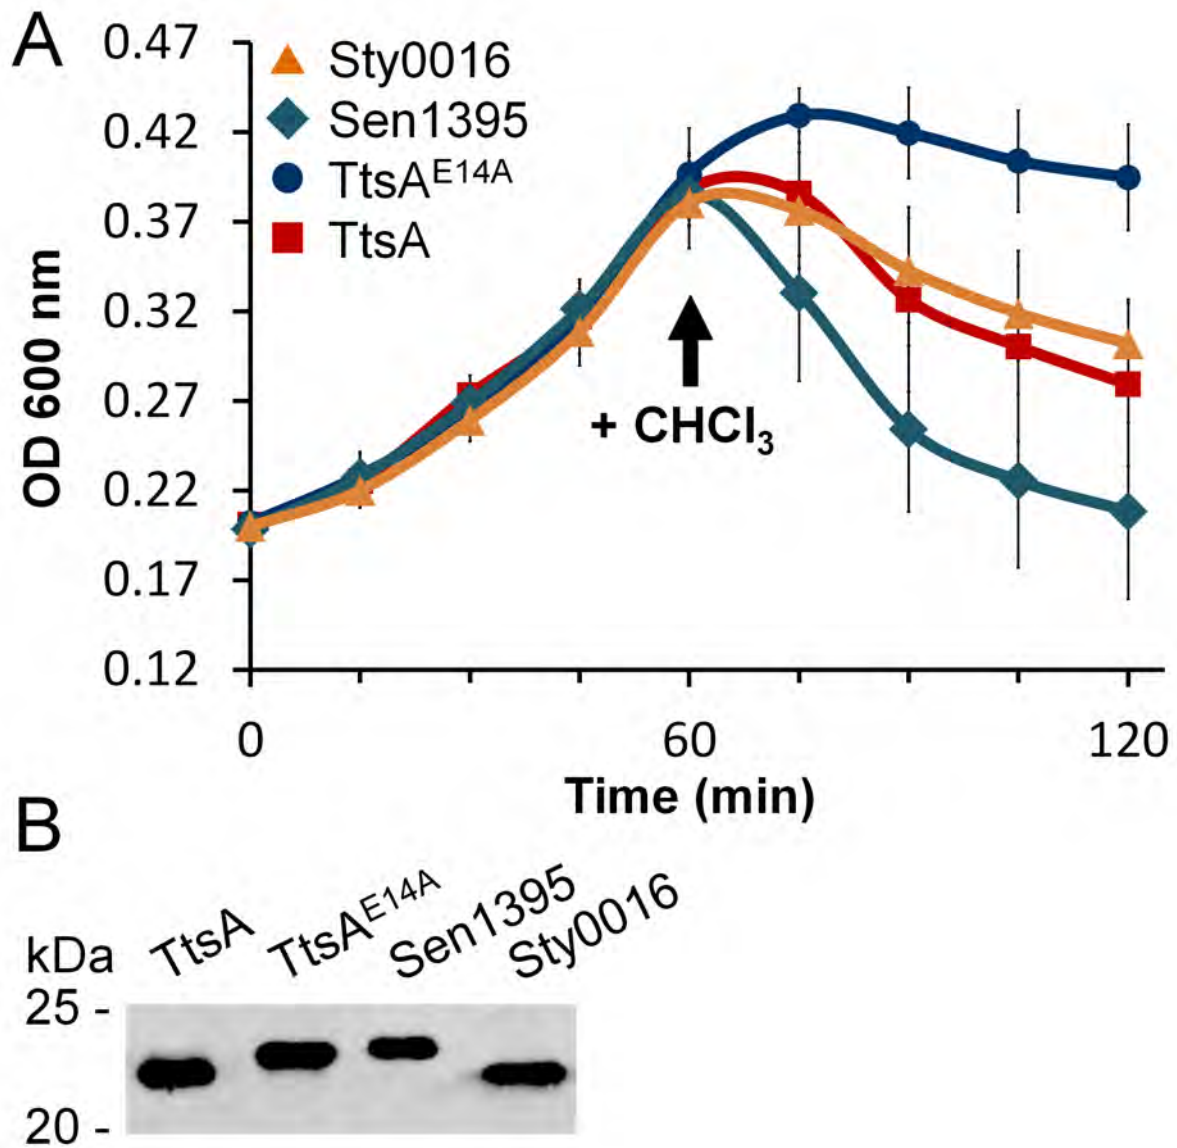

**Figure S7** | Bacteriolytic activity of TtsA's homologs. **(A)** 3xFLAG-tagged TtsA, TtsA<sup>E14A</sup>, Sty0016 or Sen1395 were overexpressed in  $\Delta$  *ttsA* *S. Typhi* from an arabinose-inducible promoter. Overnight cultures were diluted in fresh medium containing 0.2% arabinose and grown for 60 minutes. Lysis was induced by adding 0.3% chloroform (CHCl<sub>3</sub>) and monitored by measuring the OD<sub>600</sub> nm of the bacterial cultures. The graph shows the average and standard deviations of 6 independent assays. **(B)** Western blot analysis of the expression levels of the different muramidases assayed in panel (A).

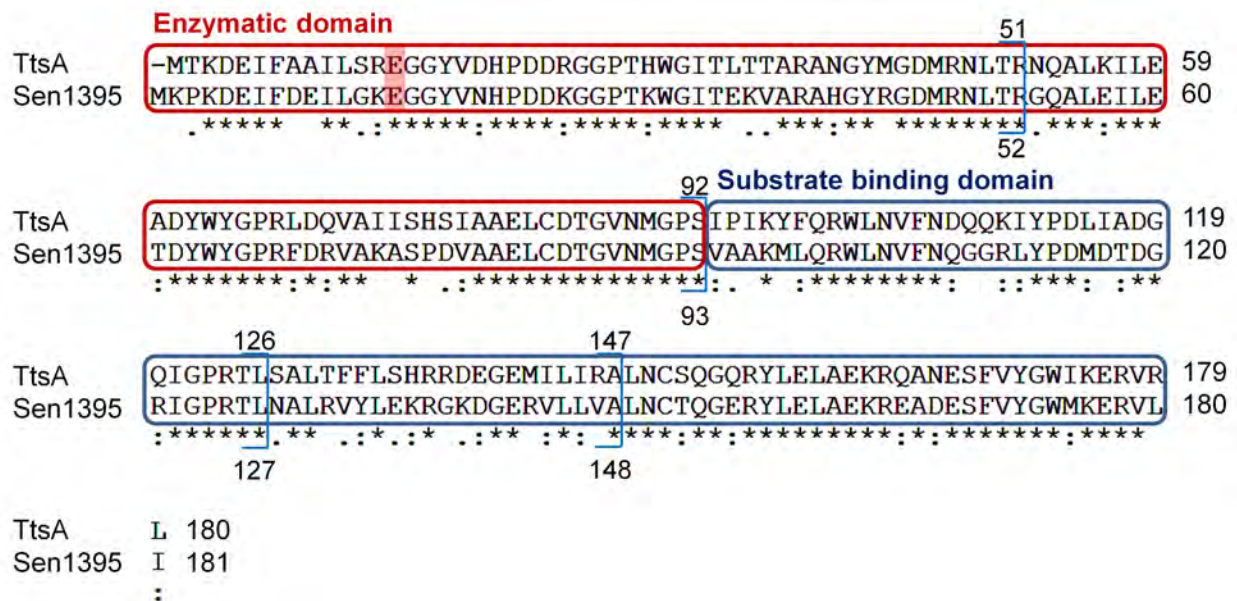

**Figure S8** | Schematic representation of the chimeras analyzed in this study that are shown in Fig. 4. The alignment between TtsA and Sen1395 was generated using ClustalW2. The enzymatic and peptidoglycan-binding domains are indicated. Blue brackets indicate the junction region used to construct the chimeras. The residue number indicated above and below the bracket corresponds to TtsA and Sen1395 sequence, respectively.

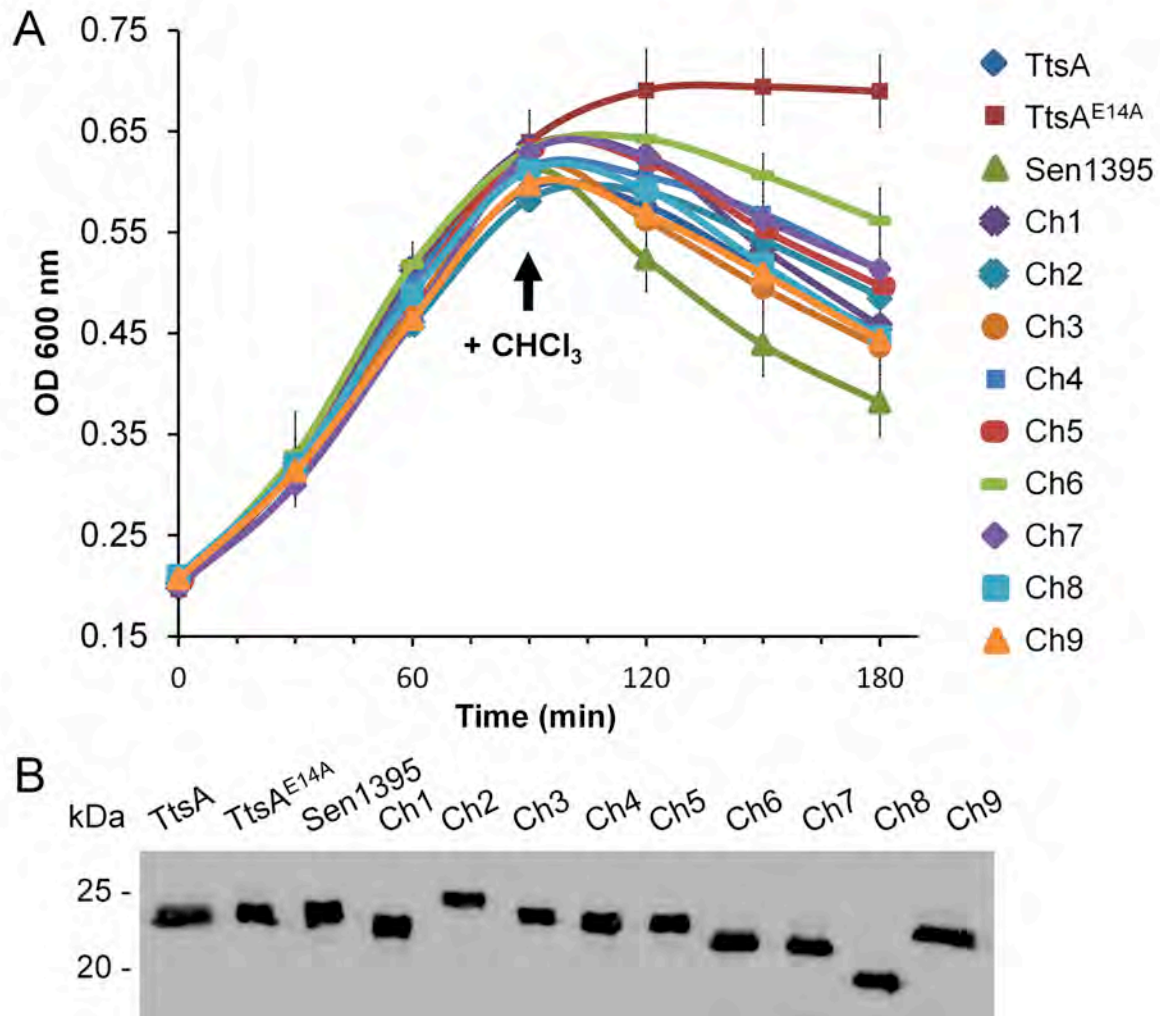

**Figure S9** | Bacteriolytic activity of TtsA-Sen1395 chimeras. **(A)** TtsA, TtsA E14A, Sen1395 and the various TtsA-Sen1395 chimeras were expressed from an arabinose-inducible promoter. Overnight cultures were diluted in fresh medium containing 0.3% arabinose and grown for 180 minutes. Lysis was induced by adding 0.3% chloroform (CHCl<sub>3</sub>) and monitored by measuring the OD<sub>600 nm</sub> of the bacterial cultures. The graph shows the average and standard deviations of 4 independent assays. **(B)** Western blot analysis of the expression levels of the different muramidases assayed in panel (A).

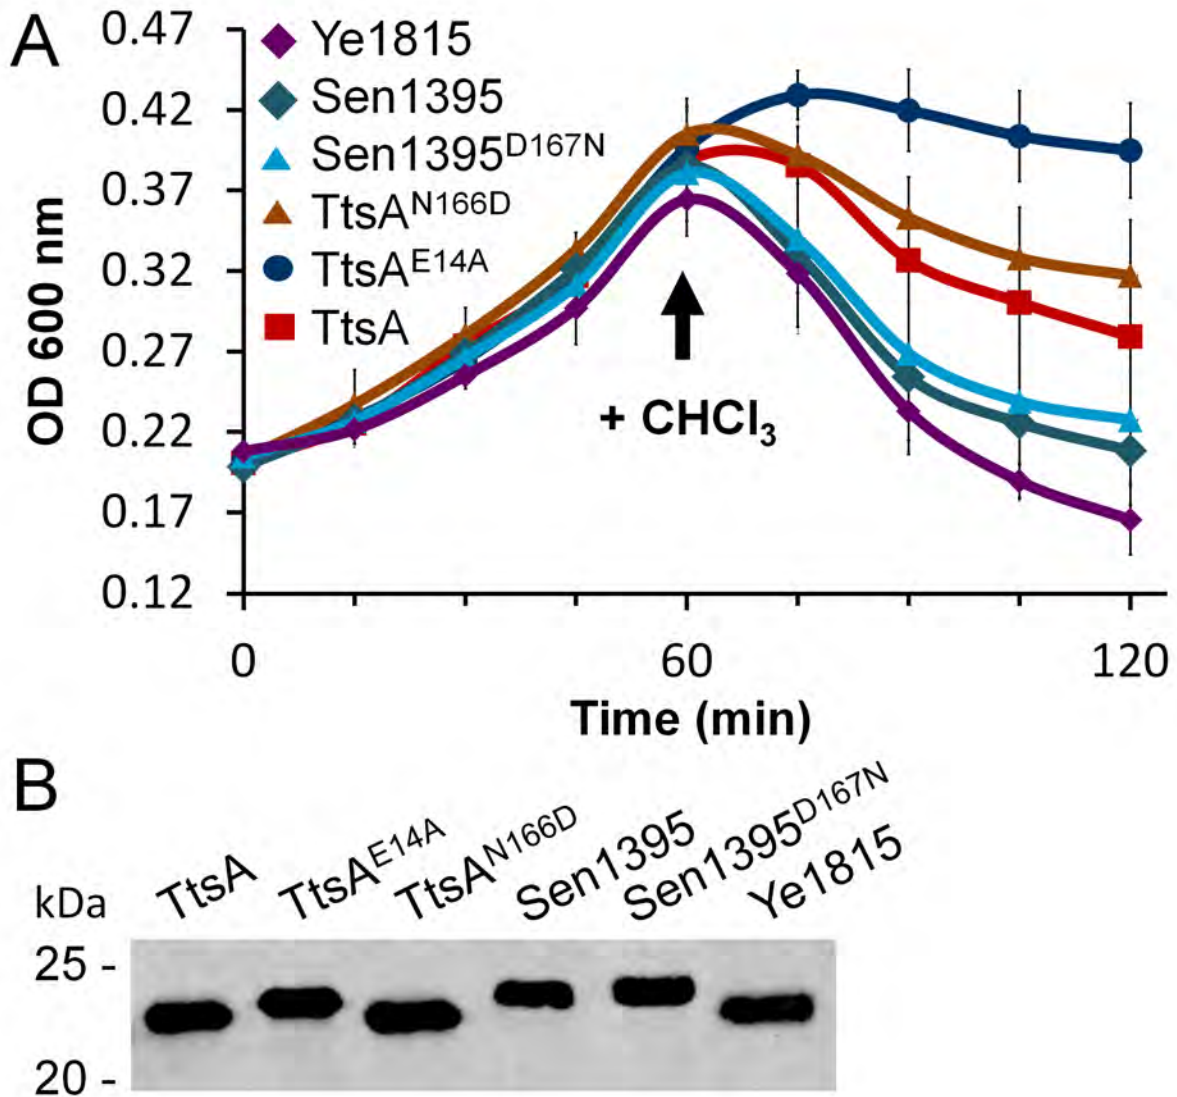

**Figure S10** | Bacteriolytic ability of TtsA<sup>N166D</sup> and Sen1395<sup>D167N</sup>. **(A)** 3xFLAG-tagged TtsA, TtsA<sup>E14A</sup>, TtsA<sup>N166D</sup>, Sen1395, Sen1395<sup>D167N</sup> or Ye1815 were overexpressed in  $\Delta ttsA$  *S. Typhi* from an arabinose-inducible promoter. Overnight cultures were diluted in fresh medium containing 0.2% arabinose and grown for 60 minutes. Lysis was induced by adding 0.3% chloroform (CHCl<sub>3</sub>) and monitored by measuring the OD600 nm of the bacterial cultures. The graph shows the average and standard deviations of 9 independent assays. **(B)** Western blot analysis of the expression levels of the different muramidases assayed in panel (A) immediately before addition of CHCl<sub>3</sub>.

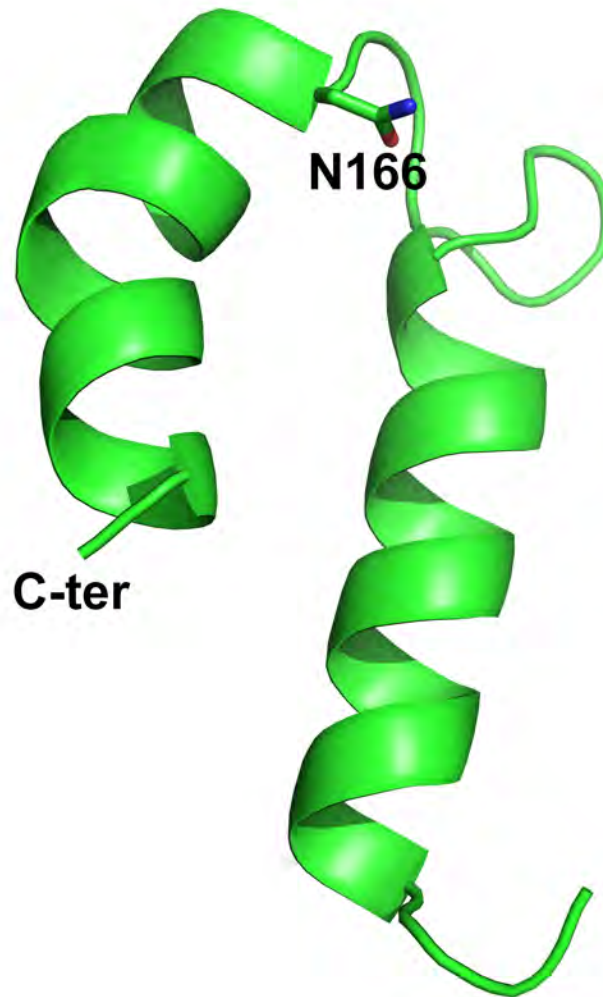

**Figure S11** | Atomic model of the carboxy terminus of TtsA showing the position of the functionally critical residue N166.

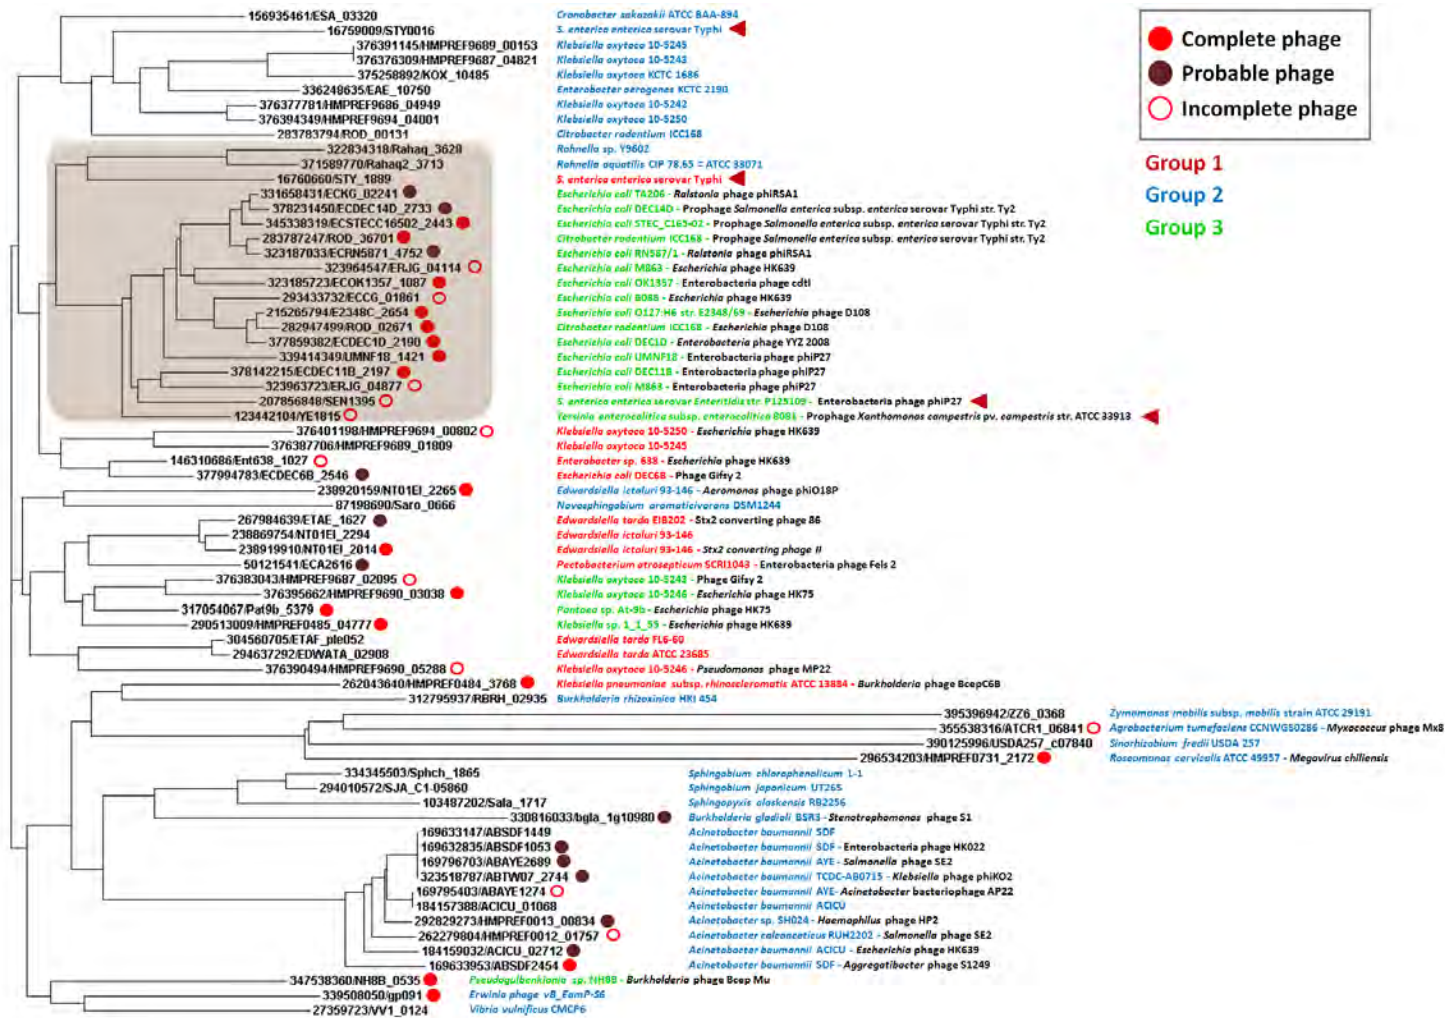

**Figure S12 |** Phylogenetic analysis of the C-terminus of the TtsA homologs. The phylogenetic tree was generated with the 36 C-terminal residues of the TtsA homologs using ClustalW2. TtsA homologs represented in this tree are the same as those represented in Supplementary Figure S6. The TtsA homologous proteins with the potential to complement typhoid toxin secretion identified in this study are highlighted in grey. PHAge Search Tool (PHAST) web server was used to analyze the loci of all the homologs represented in the tree and to identify possible prophages (8). The red, plum and empty red dots indicate TtsA homologs located in complete, probably complete or incomplete phage loci, respectively, as indicated by the PHAST tool. The likely identity of each phage is indicated. The proteins analyzed in this study are designated with red arrows. The color code for the groups 1, 2 and 3 determined in Supplementary Figure S6 was maintained in this figure.

Supplementary Table S1: Genomic contexts of TtsA-like endolysin coding genes.

| Organism                                                        | Endolysin        | Holin                                                | Phage                                                                        | Extracellular enzyme/toxin                                                                                         |
|-----------------------------------------------------------------|------------------|------------------------------------------------------|------------------------------------------------------------------------------|--------------------------------------------------------------------------------------------------------------------|
| <i>S. enterica</i> enterica serovar Typhi                       | STY1889          | ND                                                   | ND                                                                           | Typhoid toxin: STY1886 (cdtB), STY1890 (pltA), STY1891 (pltB)                                                      |
| <i>Enterobacter</i> sp. 638                                     | Ent638_1027      | yes* (between Ent638_1027 and Ent638_1028)           | <i>Escherichia</i> phage HK639                                               |                                                                                                                    |
| <i>Escherichia coli</i> DEC6B                                   | ECDEC6B_2546     | ECDEC6B_2547                                         | Gifsy 2                                                                      |                                                                                                                    |
| <i>Klebsiella oxytoca</i> 10-5250                               | HMPREF9694_00802 | yes* (between HMPREF9694_00802 and HMPREF9694_00803) | <i>Escherichia</i> phage HK639                                               | colicin* (between HMPREF9694_00801 and HMPREF9694_00802); HMPREF9694_00801 colicin/pyosin immunity protein         |
| <i>Klebsiella oxytoca</i> 10-5245                               | HMPREF9689_01809 | HMPREF9689_01808                                     | <i>Klebsiella</i> phage phiKO2                                               |                                                                                                                    |
| <i>Edwardsiella ictaluri</i> 93-146                             | NT01EI_2014      | NT01EI_2015                                          | Stx2 converting phage II                                                     |                                                                                                                    |
| <i>Edwardsiella tarda</i> EIB202                                | ETAf_1627        | ETAf_1626                                            | Stx2 converting phage 86                                                     |                                                                                                                    |
| <i>Edwardsiella ictaluri</i> 93-146                             | NT01EI_2294      | NT01EI_2295                                          | <i>Aeromonas</i> phage phiO18P                                               |                                                                                                                    |
| <i>Pectobacterium atrosepticum</i> SCRI1043                     | ECA2616          | ECA2617                                              | <i>Enterobacteria</i> phage Fels 2                                           |                                                                                                                    |
| <i>Klebsiella oxytoca</i> 10-5246                               | HMPREF9690_05288 | yes* (between HMPREF9690_05288 and HMPREF9690_05287) | <i>Pseudomonas</i> phage_MP22                                                |                                                                                                                    |
| <i>Edwardsiella tarda</i> FL6-60 plasmid pFL6-60                | ETAf_ple052      | ETAf_ple051                                          | Fels 1                                                                       |                                                                                                                    |
| <i>Edwardsiella tarda</i> ATCC 23685                            | EDWATA_02908     | EDWATA_02909                                         | <i>Enterobacteria</i> phage SfV                                              |                                                                                                                    |
| <i>Klebsiella pneumoniae</i> subsp. rhinoscleromatis ATCC 13884 | HMPREF0484_3768  | HMPREF0484_3769                                      | <i>Burkholderia</i> phage_BcepC6B                                            |                                                                                                                    |
| <i>Edwardsiella ictaluri</i> 93-146                             | NT01EI_2265      | NT01EI_2264                                          | <i>Aeromonas</i> phage phiO18P                                               |                                                                                                                    |
| <i>Erwinia</i> phage vB_EamP-S6                                 | gp091            | gp092                                                | <i>Erwinia</i> phage vB_EamP-S6                                              |                                                                                                                    |
| <i>Cronobacter sakazakii</i> ATCC BAA-894                       | ESA_03320        | ESA_03321                                            | ND                                                                           | ESA_03317 chitinase                                                                                                |
| <i>S. enterica</i> enterica serovar Typhi                       | STY0016          | STY0015                                              | ND                                                                           | STY0018 chitinase                                                                                                  |
| <i>Citrobacter rodentium</i> ICC168                             | ROD_00131        | ROD_00122                                            | ND                                                                           | ROD_00151 chitinase                                                                                                |
| <i>Enterobacter aerogenes</i> KCTC 2190                         | EAE_10750        | EAE_10745                                            | ND                                                                           | EAE_10760 chitinase                                                                                                |
| <i>Klebsiella oxytoca</i> 10-5243                               | HMPREF9689_00153 | HMPREF9689_00152                                     | ND                                                                           | HMPREF9689_00155 chitinase                                                                                         |
| <i>Klebsiella oxytoca</i> 10-5243                               | HMPREF9687_04821 | HMPREF9687_04822                                     | ND                                                                           | HMPREF9687_04819 chitinase                                                                                         |
| <i>Klebsiella oxytoca</i> KCTC 1686                             | KOX_1485         | KOX_1480                                             | ND                                                                           | KOX_1495 chitinase                                                                                                 |
| <i>Klebsiella oxytoca</i> 10-5242                               | HMPREF9686_04949 | HMPREF9686_04948                                     | ND                                                                           | HMPREF9686_04952 chitinase                                                                                         |
| <i>Klebsiella oxytoca</i> 10-5250                               | HMPREF9694_04001 | HMPREF9694_04000                                     | ND                                                                           | HMPREF9694_04003 chitinase                                                                                         |
| <i>Rahnella</i> sp. Y9602                                       | Rahaq_3628       | Rahaq_3626                                           | ND                                                                           | Rahaq_3630 chitinase                                                                                               |
| <i>Rahnella aquatilis</i> CIP 78.65 = ATCC 33071                | Rahaq2_3713      | ND                                                   | ND                                                                           | Rahaq2_3715 chitinase                                                                                              |
| <i>Novosphingobium aromaticivorans</i> DSM1244                  | Saro_0666        | Saro_0667; Saro_0668                                 | <i>Burkholderia</i> phage_phi1026b                                           |                                                                                                                    |
| <i>Sphingopyxis alaskensis</i> RB2256                           | Sala_1717        | Sala_1718                                            | ND                                                                           |                                                                                                                    |
| <i>Sphingobium chlorophenicum</i> L-1                           | Sphch_1865       | Sphch_1866                                           | ND                                                                           |                                                                                                                    |
| <i>Sphingobium japonicum</i> UT26S                              | SJA_CI-05860     | SJA_CI-05850                                         | ND                                                                           |                                                                                                                    |
| <i>Burkholderia gladioli</i> BSR                                | bgla_1g10980     | ND                                                   | <i>Stenotrophomonas</i> phage_S1                                             |                                                                                                                    |
| <i>Burkholderia rhizoxinica</i> HK1 454                         | BRRH_02935       | ND                                                   | ND                                                                           |                                                                                                                    |
| <i>Vibrio vulnificus</i> CMCP6                                  | VV1_0124         | ND                                                   | ND                                                                           |                                                                                                                    |
| <i>Acinetobacter baumannii</i> SDF                              | ABSDF1449        | ND                                                   | ND                                                                           |                                                                                                                    |
| <i>Acinetobacter baumannii</i> SDF                              | ABSDF1053        | ABSDF1052                                            | <i>Enterobacteria</i> phage HK022                                            |                                                                                                                    |
| <i>Acinetobacter baumannii</i> AYE                              | ABAYE1274        | ABAYE1273                                            | <i>Acinetobacter</i> bacteriophage AP22                                      |                                                                                                                    |
| <i>Acinetobacter baumannii</i> AYE                              | ABAYE2689        | ABAYE2690                                            | <i>Salmonella</i> phage SE2                                                  |                                                                                                                    |
| <i>Acinetobacter</i> sp. SH024                                  | HMPREF0013_00834 | HMPREF0013_00835                                     | <i>Haemophilus</i> phage HP2                                                 |                                                                                                                    |
| <i>Acinetobacter baumannii</i> SDF                              | ABSDF2454        | ABSDF2455                                            | <i>Aggregatibacter</i> phage S1249                                           |                                                                                                                    |
| <i>Acinetobacter baumannii</i> TCDC-AB0715                      | ABTW07_2744      | ABTW07_2745                                          | <i>Klebsiella</i> phage_phiKO2                                               |                                                                                                                    |
| <i>Acinetobacter baumannii</i> ACICU                            | ACICU_01068      | ACICU_01067                                          | ND                                                                           |                                                                                                                    |
| <i>Acinetobacter calcoaceticus</i> RUH2202                      | HMPREF0012_01757 | HMPREF0012_01759; HMPREF0012_01758                   | <i>Salmonella</i> phage SE2                                                  |                                                                                                                    |
| <i>Acinetobacter baumannii</i> ACICU                            | ACICU_02712      | ACICU_02714; ACICU_02713                             | <i>Escherichia</i> phage HK639                                               |                                                                                                                    |
| <i>Zymomonas mobilis</i> subsp. mobilis strain ATCC 29191       | ZZ6_0368         | ZZ6_0369                                             | ND                                                                           | ZZ6_0875 levansucrase; ZZ6_0874 invertase                                                                          |
| <i>Sinorhizobium fredii</i> USDA 257                            | USDA257_c07840   | ND                                                   | ND                                                                           |                                                                                                                    |
| <i>Agrobacterium tumefaciens</i> CCNWS0286                      | ATCR1_06841      | yes* (between ATCR1_06841 and ATCR1_06851)           | <i>Myxococcus</i> phage_Mx8                                                  |                                                                                                                    |
| <i>Roseomonas cervicalis</i> ATCC 49957                         | HMPREF0731_2172  | HMPREF0731_2174                                      | <i>Megavirus</i> chiliensis                                                  |                                                                                                                    |
| <i>Citrobacter rodentium</i> ICC168                             | ROD_36701        | ROD_36711                                            | Prophage <i>Salmonella</i> enterica subsp. enterica serovar Typhi str. Ty2   |                                                                                                                    |
| <i>Escherichia coli</i> STEC_C165-02                            | ECSTEC16502_2443 | ECSTEC16502_2442                                     | Prophage <i>Salmonella</i> enterica subsp. enterica serovar Typhi str. Ty2   |                                                                                                                    |
| <i>Escherichia coli</i> TA206                                   | ECKG_02241       | ECKG_02240                                           | <i>Ralstonia</i> phage_phiRSA1                                               |                                                                                                                    |
| <i>Escherichia coli</i> DEC14D                                  | ECDEC14D_2733    | ECDEC14D_2732                                        | Prophage <i>Salmonella</i> enterica subsp. enterica serovar Typhi str. Ty2   |                                                                                                                    |
| <i>Escherichia coli</i> RN587/1                                 | ECRN5871_4752    | ECRN5871_4751                                        | <i>Ralstonia</i> phage_phiRSA1                                               |                                                                                                                    |
| <i>Escherichia coli</i> M863                                    | ERJG_04114       | ERJG_04112; ERJG_04113                               | <i>Escherichia</i> phage HK639                                               | ERJG_04110 ptxB; ERJG_04110 ptxA; ERJG_04115 heat-labile enterotoxin I; ERJG_04116 heat-labile enterotoxin II      |
| <i>Escherichia coli</i> DEC11B                                  | ECDEC11B_2197    | ECDEC11B_2199; ECDEC11B_2198                         | <i>Enterobacteria</i> phage_phiP27                                           |                                                                                                                    |
| <i>Escherichia coli</i> OK1357                                  | ECOK1357_1087    | ECOK1357_1088                                        | <i>Enterobacteria</i> phage cdtI                                             |                                                                                                                    |
| <i>Citrobacter rodentium</i> ICC168                             | ROD_02671        | ROD_02691; ROD_02681                                 | <i>Escherichia</i> phage_D108                                                |                                                                                                                    |
| <i>Escherichia coli</i> O127:H6 str. E2348/69                   | E2348C_2654      | E2348C_2652; E2348C_2653                             | <i>Escherichia</i> phage_D108                                                |                                                                                                                    |
| <i>Escherichia coli</i> DEC1D                                   | ECDEC1D_2190     | ECDEC1D_2188; ECDEC1D_2189                           | <i>Enterobacteria</i> phage_YYZ_2008                                         |                                                                                                                    |
| <i>Escherichia coli</i> UMN18                                   | UMNF18_1421      | UMNF18_1419; UMN18_1420                              | <i>Enterobacteria</i> phage_phiP27                                           |                                                                                                                    |
| <i>Escherichia coli</i> B088                                    | ECCG_01861       | ECCG_01859; ECCG_01860                               | <i>Escherichia</i> phage HK639                                               | ECCG_01862 heat labile enterotoxin IIB; ECCG_01863 heat labile enterotoxin IIA (between ECCG_01862 and ECCG_01863) |
| <i>Escherichia coli</i> M863                                    | ERJG_04877       | ERJG_04878                                           | <i>Enterobacteria</i> phage_phiP27                                           |                                                                                                                    |
| <i>S. enterica</i> enterica serovar Enteritidis str. P125109    | SEN1395          | SEN1394                                              | <i>Enterobacteria</i> phage_phiP27                                           |                                                                                                                    |
| <i>Yersinia enterocolitica</i> enterocolitica 8081              | YE1815           | YE1814                                               | Prophage <i>Xanthomonas campestris</i> pv. <i>campestris</i> str. ATCC 33913 |                                                                                                                    |
| <i>Pantoea</i> sp. At-9b                                        | Pat9b_5379       | Pat9b_5378; Pat9b_5380                               | <i>Escherichia</i> phage HK75                                                |                                                                                                                    |
| <i>Klebsiella</i> sp. 1_1_55                                    | HMPREF0485_04777 | HMPREF0485_04776; HMPREF0485_04778                   | <i>Escherichia</i> phage HK639                                               |                                                                                                                    |
| <i>Klebsiella oxytoca</i> 10-5243                               | HMPREF9687_02095 | HMPREF9687_02096; HMPREF9687_02094                   | Gifsy 2                                                                      |                                                                                                                    |
| <i>Klebsiella oxytoca</i> 10-5246                               | HMPREF9690_03038 | HMPREF9690_03039; HMPREF9690_03037                   | <i>Escherichia</i> phage HK75                                                |                                                                                                                    |
| <i>Pseudogulbenkiania</i> sp. NH8B                              | NH8B_0535        | ND                                                   | <i>Burkholderia</i> phage_Bcep_Mu                                            |                                                                                                                    |

ND: not detected

\*: identified in this study



Table S2: Bacterial strains and plasmids used in this study

| Strains          | Description                                                                 | Reference  |
|------------------|-----------------------------------------------------------------------------|------------|
| S. Typhi ISP2825 | Reference strain                                                            | 1          |
| SB1944           | <i>S. Typhi</i> <i>cdtB</i> <sup>3xFLAG</sup>                               | 2          |
| SB2644           | <i>S. Typhi</i> <i>cdtB</i> <sup>3xFLAG</sup> $\Delta$ <i>ttsA</i>          | This study |
| SB2349           | <i>S. Typhi</i> $\Delta$ <i>STY1887</i>                                     | This study |
| SB1844           | <i>S. Typhi</i> $\Delta$ <i>ttsA</i>                                        | This study |
| SB2142           | <i>S. Typhi</i> <i>cdtB</i> <sup>3xFLAG</sup> <i>ttsA</i> <sup>3xFLAG</sup> | This study |
| SB2143           | <i>S. Typhi</i> <i>cdtB</i> <sup>3xFLAG</sup> $\Delta$ <i>STY0015</i>       | This study |

  

| Plasmids | Description                                                                                                           | Reference  |
|----------|-----------------------------------------------------------------------------------------------------------------------|------------|
| pSB3324  | pWSK129 derived, low copy, P <sub>ara</sub> , allows C-terminal 3xFLAG tagging; Kan <sup>R</sup>                      | This study |
| pSB3335  | pSB3324 <i>ttsA</i> <sup>3xFLAG</sup>                                                                                 | This study |
| pSB3950  | pSB3324 <i>ttsA</i> <sup>E14A 3xFLAG</sup>                                                                            | This study |
| pSB4027  | pSB3324 <i>SEN1395</i> <sup>3xFLAG</sup>                                                                              | This study |
| pSB4031  | pSB3324 <i>STY0016</i> <sup>3xFLAG</sup>                                                                              | This study |
| pSB4512  | pSB3324 <i>YE1815</i> <sup>3xFLAG</sup>                                                                               | This study |
| pSB4372  | pSB3324 <i>SEN1395</i> <sup>D167N 3xFLAG</sup>                                                                        | This study |
| pSB4719  | pSB3324 <i>STY0015</i> <i>STY0016</i> <sup>3xFLAG</sup>                                                               | This study |
| pSB4720  | pSB3324 <i>STY0015</i> <i>ttsA</i> <sup>3xFLAG</sup>                                                                  | This study |
| pSB4721  | pSB3324 <i>STY0015</i> <i>ttsA</i> <sup>E14A 3xFLAG</sup>                                                             | This study |
| pSB4352  | pSB3324 <i>ttsA</i> <sup>O154E 3xFLAG</sup>                                                                           | This study |
| pSB4353  | pSB3324 <i>ttsA</i> <sup>O164E 3xFLAG</sup>                                                                           | This study |
| pSB4354  | pSB3324 <i>ttsA</i> <sup>N166D 3xFLAG</sup>                                                                           | This study |
| pSB4355  | pSB3324 <i>ttsA</i> <sup>I174M 3xFLAG</sup>                                                                           | This study |
| pSB4356  | pSB3324 <i>ttsA</i> <sup>R179L 3xFLAG</sup>                                                                           | This study |
| pSB4201  | pSB3324 <i>SEN1395</i> <sup>[1-127]</sup> <i>ttsA</i> <sup>[127-181] 3xFLAG</sup>                                     | This study |
| pSB4202  | pSB3324 <i>SEN1395</i> <sup>[1-93]</sup> <i>ttsA</i> <sup>[93-181] 3xFLAG</sup>                                       | This study |
| pSB4203  | pSB3324 <i>SEN1395</i> <sup>[1-52]</sup> <i>ttsA</i> <sup>[52-181] 3xFLAG</sup>                                       | This study |
| pSB4204  | pSB3324 <i>ttsA</i> <sup>[1-126]</sup> <i>SEN1395</i> <sup>[128-181] 3xFLAG</sup>                                     | This study |
| pSB4205  | pSB3324 <i>ttsA</i> <sup>[1-92]</sup> <i>SEN1395</i> <sup>[94-181] 3xFLAG</sup>                                       | This study |
| pSB4206  | pSB3324 <i>ttsA</i> <sup>[1-51]</sup> <i>SEN1395</i> <sup>[53-180] 3xFLAG</sup>                                       | This study |
| pSB4207  | pSB3324 <i>ttsA</i> <sup>[1-147]</sup> <i>SEN1395</i> <sup>[149-180] 3xFLAG</sup>                                     | This study |
| pSB4210  | pSB3324 <i>SEN1395</i> <sup>[1-127]</sup> <i>ttsA</i> <sup>[127-147]</sup> <i>SEN1395</i> <sup>[149-181] 3xFLAG</sup> | This study |
| pSB4211  | pSB3324 <i>SEN1395</i> <sup>[1-148]</sup> <i>ttsA</i> <sup>[148-180] 3xFLAG</sup>                                     | This study |
| pSB3833  | pSB3324 <i>sty4425</i> <sup>3xFlag</sup>                                                                              | This study |
| pSB3832  | pBAD24 <i>ttsA</i> <sup>3xFLAG</sup>                                                                                  | This study |
| pSB3957  | pBAD24 <i>ttsA</i> <sup>E14A 3xFLAG</sup>                                                                             | This study |
| pSB4368  | pBAD24 <i>ttsA</i> <sup>N166D 3xFLAG</sup>                                                                            | This study |
| pSB4380  | pBAD24 <i>STY0016</i> <sup>3xFLAG</sup>                                                                               | This study |
| pSB4369  | pBAD24 <i>SEN1395</i> <sup>3xFLAG</sup>                                                                               | This study |
| pSB4379  | pBAD24 <i>SEN1395</i> <sup>D167N 3xFLAG</sup>                                                                         | This study |
| pSB4518  | pBAD24 <i>YE181</i> <sup>3xFLAG</sup>                                                                                 | This study |
| pSB890   | R6K origin; can be counterselected for with sucrose; Tet <sup>R</sup>                                                 | 3          |
| pSB3567  | pSB890 for C-terminal 3xFLAG tagging of <i>ttsA</i> in chromosome of <i>S. Typhi</i>                                  | This study |
| pSB3252  | pSB890 for replacement of <i>cdtB</i> 3xFLAG by <i>phoA</i> 3xFLAG in SB1944                                          | This study |
| pBAD24   | Used for arabinose-inducible overexpression in <i>S. Typhi</i> $\Delta$ <i>ttsA</i> ; Amp <sup>R</sup>                | 4          |

1: Galan JE, Curtiss R, 3rd. Infect Immun. 1991;59(9):2901-8.

2: Spano S, Ugalde JE, Galan JE. Cell Host Microbe. 2008;3(1):30-8.

3: Kaniga K, Bossio JC, Galan JE. Mol Microbiol. 1994;13(4):555-68.

4: Guzman LM, Belin D, Carson MJ, Beckwith J. J Bacteriol. 1995;177:4121-30.
